# Supplementary material for: Surface-Modified Multifunctional Thymol-Loaded Biodegradable Nanoparticles for Topical Acne Treatment
Source: MDPI journal article supplement (doi:10.3390/pharmaceutics13091501), 2021-09-18
Supplement: s1 [file s1]

# Supplementary Materials: Surface-Modified Multifunctional Thymol-Loaded Biodegradable Nanoparticles for Topical Acne Treatment

Camila Folle, Natalia Díaz-Garrido, Elena Sánchez-López, Ana Maria Marqués, Josefa Badia, Laura Baldomà, Marta Espina, Ana Cristina Calpena and María Luisa García

**Table S1.** Oligonucleotide primers used for RT-qPCR.

| Gene             | Forward (5'-3')          | Reverse (5'-3')       |
|------------------|--------------------------|-----------------------|
| TNF- $\alpha$    | CTGCTGCACTTTGGAGTGAT     | AGATGATCTGACTGCCTGGG  |
| IL-1 $\alpha$    | GAAGAGACGGTTGAGTTTAAGCC  | CAGGAAGCTAAAAGGTGCTGA |
| IL-1 $\beta$     | GTGGCAATGAGGATGACTTGTTTC | TAGTGGTGTCGGAGATTCGTA |
| IL-8             | CTGATTTCTGCAGCTCTGTG     | GGGTGGAAGGTTTGGAGTATG |
| IL-6             | AGCCACTCACCTCTTCAGAAC    | GCCTCTTGCTGCTTTCACAC  |
| Keratin 16 (K16) | CAGCGAACTGGTACAGAGCA     | GTTCTCCAGGGATGCTTCA   |

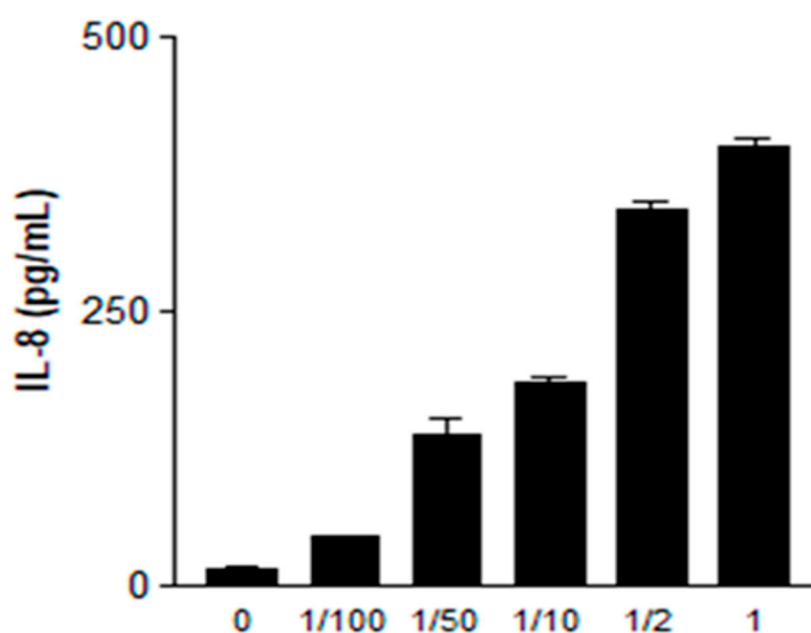

**Figure S1.** Dose-dependent inflammatory capacity of *C. acnes*. HaCaT cells were incubated for 24 h with the indicated dilutions of the *C. acnes* stock inoculum (adjusted to OD 1.2 at 550 nm). Value 1 indicates no dilution. Secreted IL-8 was quantified in the cell culture supernatant by ELISA. Values of IL-8 (pg/mL) are the Mean  $\pm$  SD,  $n=3$ .
